# Supplementary material for: Accessing three-branched high-affinity cereblon ligands for molecular glue and protein degrader design
Source: Royal Society of Chemistry journal article supplement (doi:10.1039/d2cb00223j), 2023-01-01
Supplement: d2cb00223j3.pdf [file d2cb00223j3.pdf]

BRD4

Total Protein Stain

Blot 1

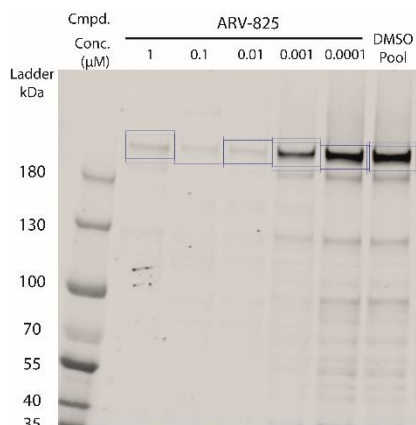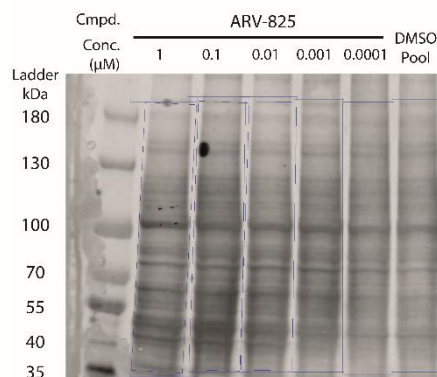

Blot 2

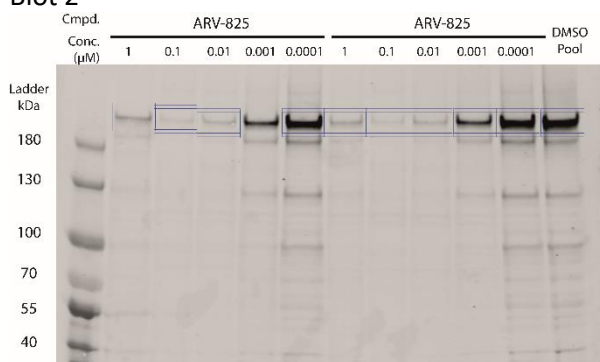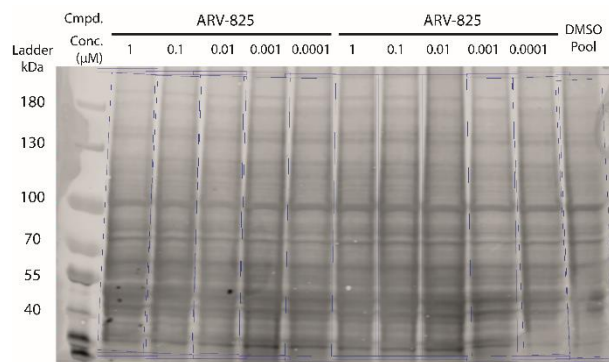

Blot 3

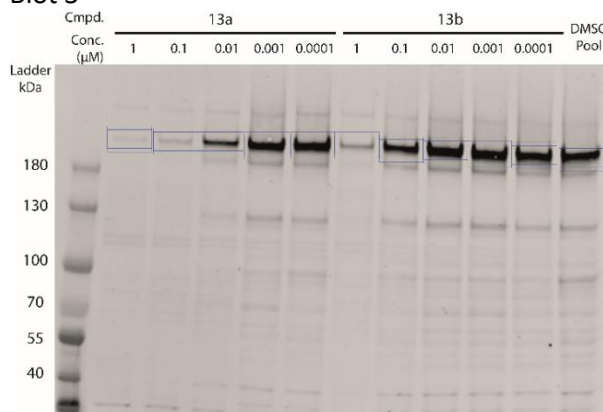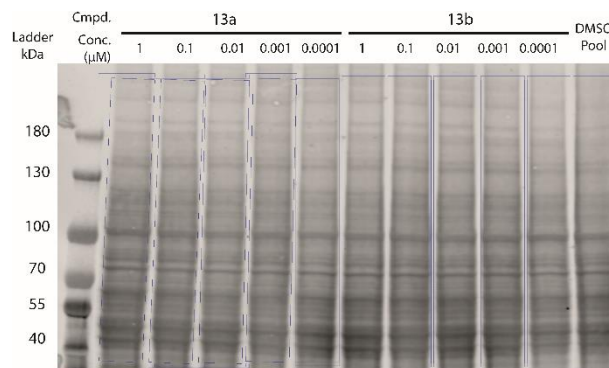

### Blot 4

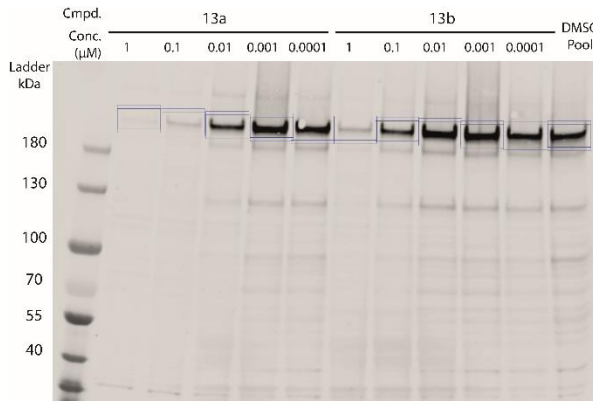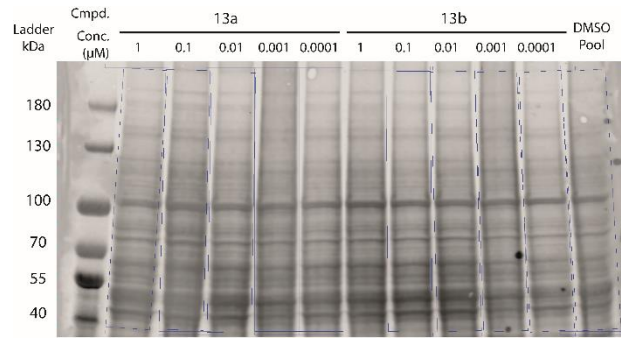

### Blot 5

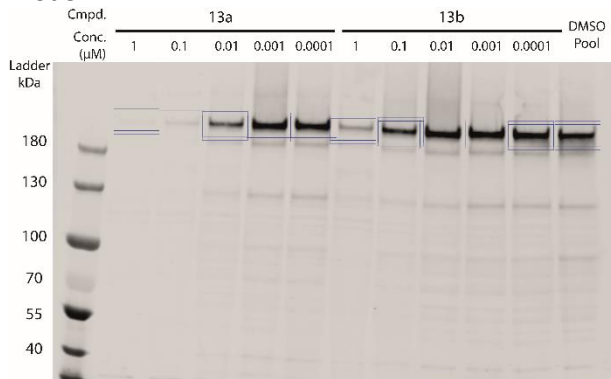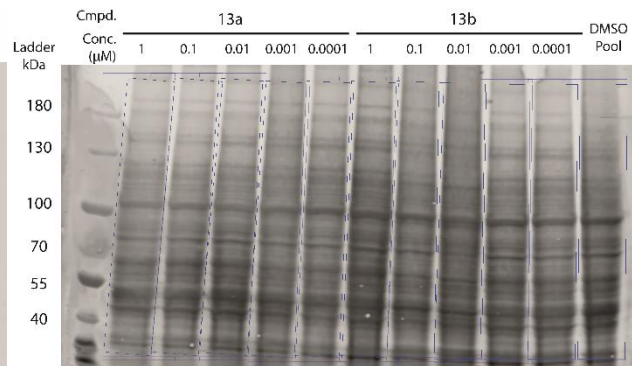

### Blot 6

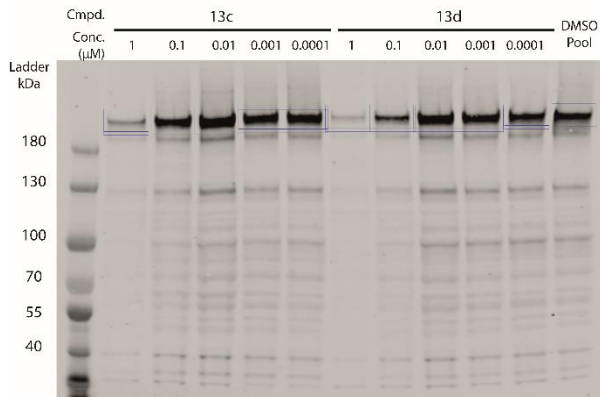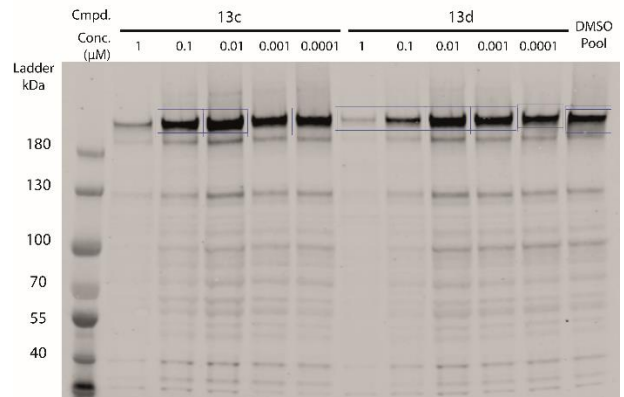

### Blot 7

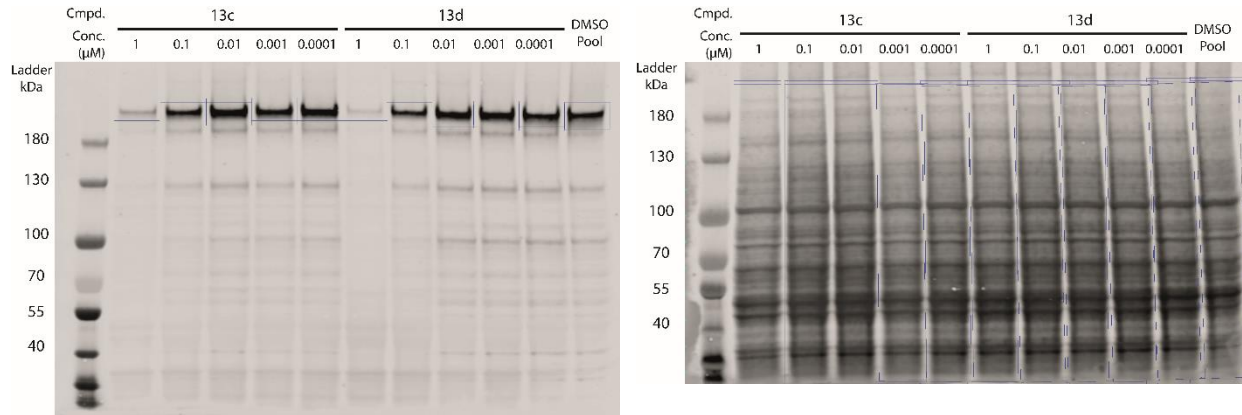

### Blot 8

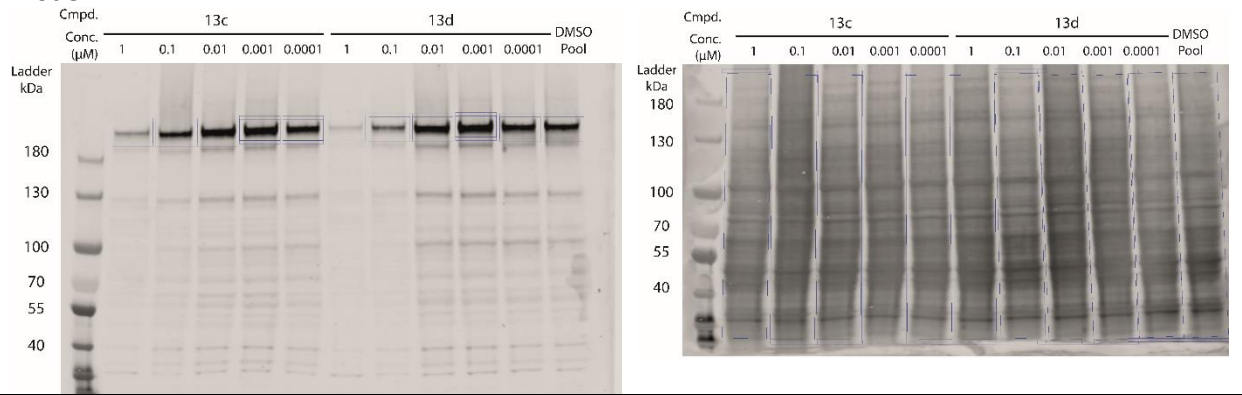

|                                          | Lane 2 | Lane 3 | Lane 4 | Lane 5 | Lane 6 | Lane 7 | Lane 8 | Lane 9 | Lane 10 | Lane 11 | Lane 12 |
|------------------------------------------|--------|--------|--------|--------|--------|--------|--------|--------|---------|---------|---------|
| <b>Blot 1</b>                            |        |        |        |        |        |        |        |        |         |         |         |
| Normalization factor total protein stain | 0.876  | 0.970  | 0.806  | 0.811  | 0.721  | 0.667  |        |        |         |         |         |
| adj. BRD4 band volume [DMSO as 100%]     | 3.8    | 1.4    | 2.6    | 28.0   | 74.8   | 100.0  |        |        |         |         |         |
| <b>Blot 2</b>                            |        |        |        |        |        |        |        |        |         |         |         |
| Normalization factor total protein stain | 0.762  | 0.767  | 0.730  | 0.900  | 0.856  | 0.823  | 0.869  | 1.000  | 0.801   | 0.747   | 0.748   |
| adj. BRD4 band volume [DMSO as 100%]     | 8.4    | 1.7    | 4.0    | 26.7   | 81.8   | 6.3    | 1.6    | 3.2    | 30.3    | 95.0    | 100.0   |
| <b>Blot 3</b>                            |        |        |        |        |        |        |        |        |         |         |         |
| Normalization factor total protein stain | 1.000  | 0.908  | 0.840  | 0.876  | 0.894  | 0.972  | 0.962  | 0.981  | 0.913   | 0.850   | 0.923   |
| adj. BRD4 band volume [DMSO as 100%]     | 1.5    | 4.7    | 38.0   | 119.6  | 138.9  | 12.0   | 66.3   | 144.3  | 147.3   | 120.2   | 100.0   |
| <b>Blot 4</b>                            |        |        |        |        |        |        |        |        |         |         |         |
| Normalization factor total protein stain | 0.827  | 0.928  | 0.904  | 0.964  | 0.838  | 1.000  | 0.924  | 0.967  | 0.952   | 0.760   | 0.849   |
| adj. BRD4 band volume [DMSO as 100%]     | 1.6    | 6.4    | 59.5   | 136.1  | 123.2  | 10.9   | 58.8   | 149.3  | 147.7   | 123.0   | 100.0   |
| <b>Blot 5</b>                            |        |        |        |        |        |        |        |        |         |         |         |
| Normalization factor total protein stain | 0.763  | 0.766  | 0.865  | 0.863  | 0.833  | 0.995  | 0.910  | 1.000  | 0.889   | 0.835   | 0.927   |
| adj. BRD4 band volume [DMSO as 100%]     | 1.0    | 4.3    | 42.8   | 111.5  | 120.3  | 18.5   | 60.9   | 112.6  | 132.5   | 143.5   | 100.0   |
| <b>Blot 6</b>                            |        |        |        |        |        |        |        |        |         |         |         |
| Normalization factor total protein stain | 0.833  | 0.945  | 1.000  | 0.802  | 0.804  | 0.835  | 0.847  | 0.988  | 0.771   | 0.777   | 0.812   |
| adj. BRD4 band volume [DMSO as 100%]     | 19.0   | 97.2   | 174.0  | 110.3  | 129.5  | 8.0    | 43.6   | 120.1  | 122.8   | 90.3    | 100.0   |
| <b>Blot 7</b>                            |        |        |        |        |        |        |        |        |         |         |         |
| Normalization factor total protein stain | 0.790  | 0.928  | 0.967  | 0.827  | 0.913  | 0.938  | 1.000  | 0.965  | 0.975   | 0.966   | 0.870   |
| adj. BRD4 band volume [DMSO as 100%]     | 18.3   | 77.7   | 135.6  | 106.3  | 137.7  | 6.5    | 62.4   | 113.1  | 116.4   | 94.7    | 100.0   |
| <b>Blot 8</b>                            |        |        |        |        |        |        |        |        |         |         |         |
| Normalization factor total protein stain | 0.715  | 0.902  | 0.812  | 0.775  | 0.723  | 0.874  | 0.832  | 1.000  | 0.858   | 0.764   | 0.850   |
| adj. BRD4 band volume [DMSO as 100%]     | 24.3   | 60.0   | 142.8  | 157.4  | 112.4  | 6.9    | 37.4   | 102.7  | 151.4   | 111.9   | 100.0   |

**Figure S6:** Quantification of BRD4 from treated Namalwa cells by western blotting. Right panels show total protein stain images of nitrocellulose-membranes; the same immunoblots stained with BRD4 mAb are depicted in the left panels. Bands were quantified within the indicated boxes. The table shows the

normalization factors and the adjusted (adj.) band volumes for BRD4. The band volume of the DMSO pool sample was set as 100%.

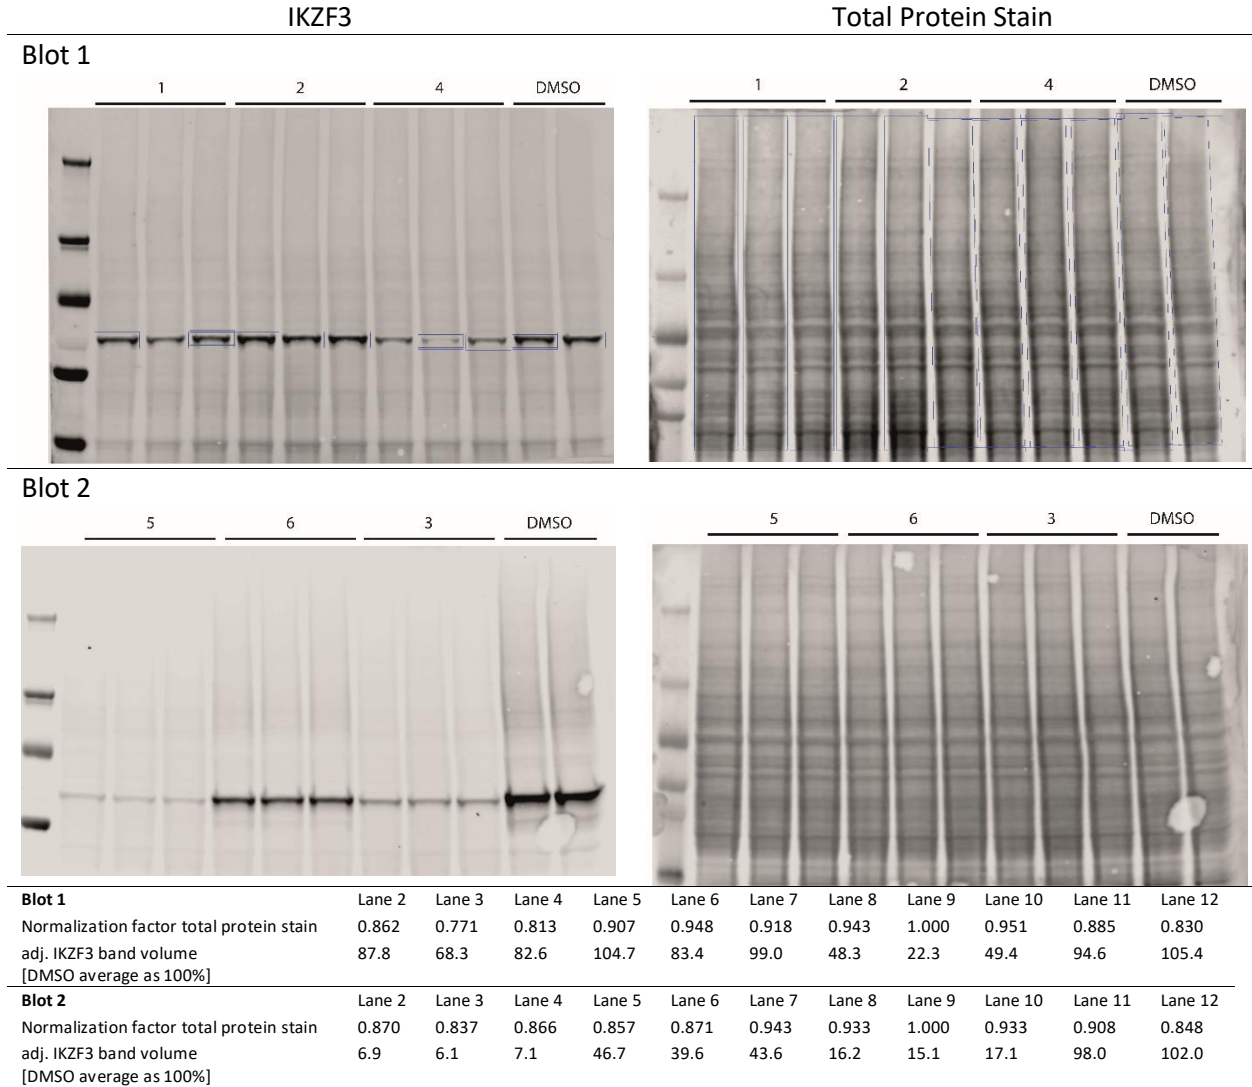

**Figure S7:** Quantification of IKZF3 from treated OPM2 cells by western blotting. Right panels show total protein stain images of nitrocellulose-membranes; the same immunoblots stained with IKZF3 mAb are depicted in the left panels. The table shows the normalization factors and the adjusted (adj.) band volumes for BRD4. The average band volume of the DMSO sample was set as 100%.
