# Supplementary figures and images for: Accessing three-branched high-affinity cereblon ligands for molecular glue and protein degrader design
Source: Royal Society of Chemistry journal article supplement (doi:10.1039/d2cb00223j), 2023-01-01

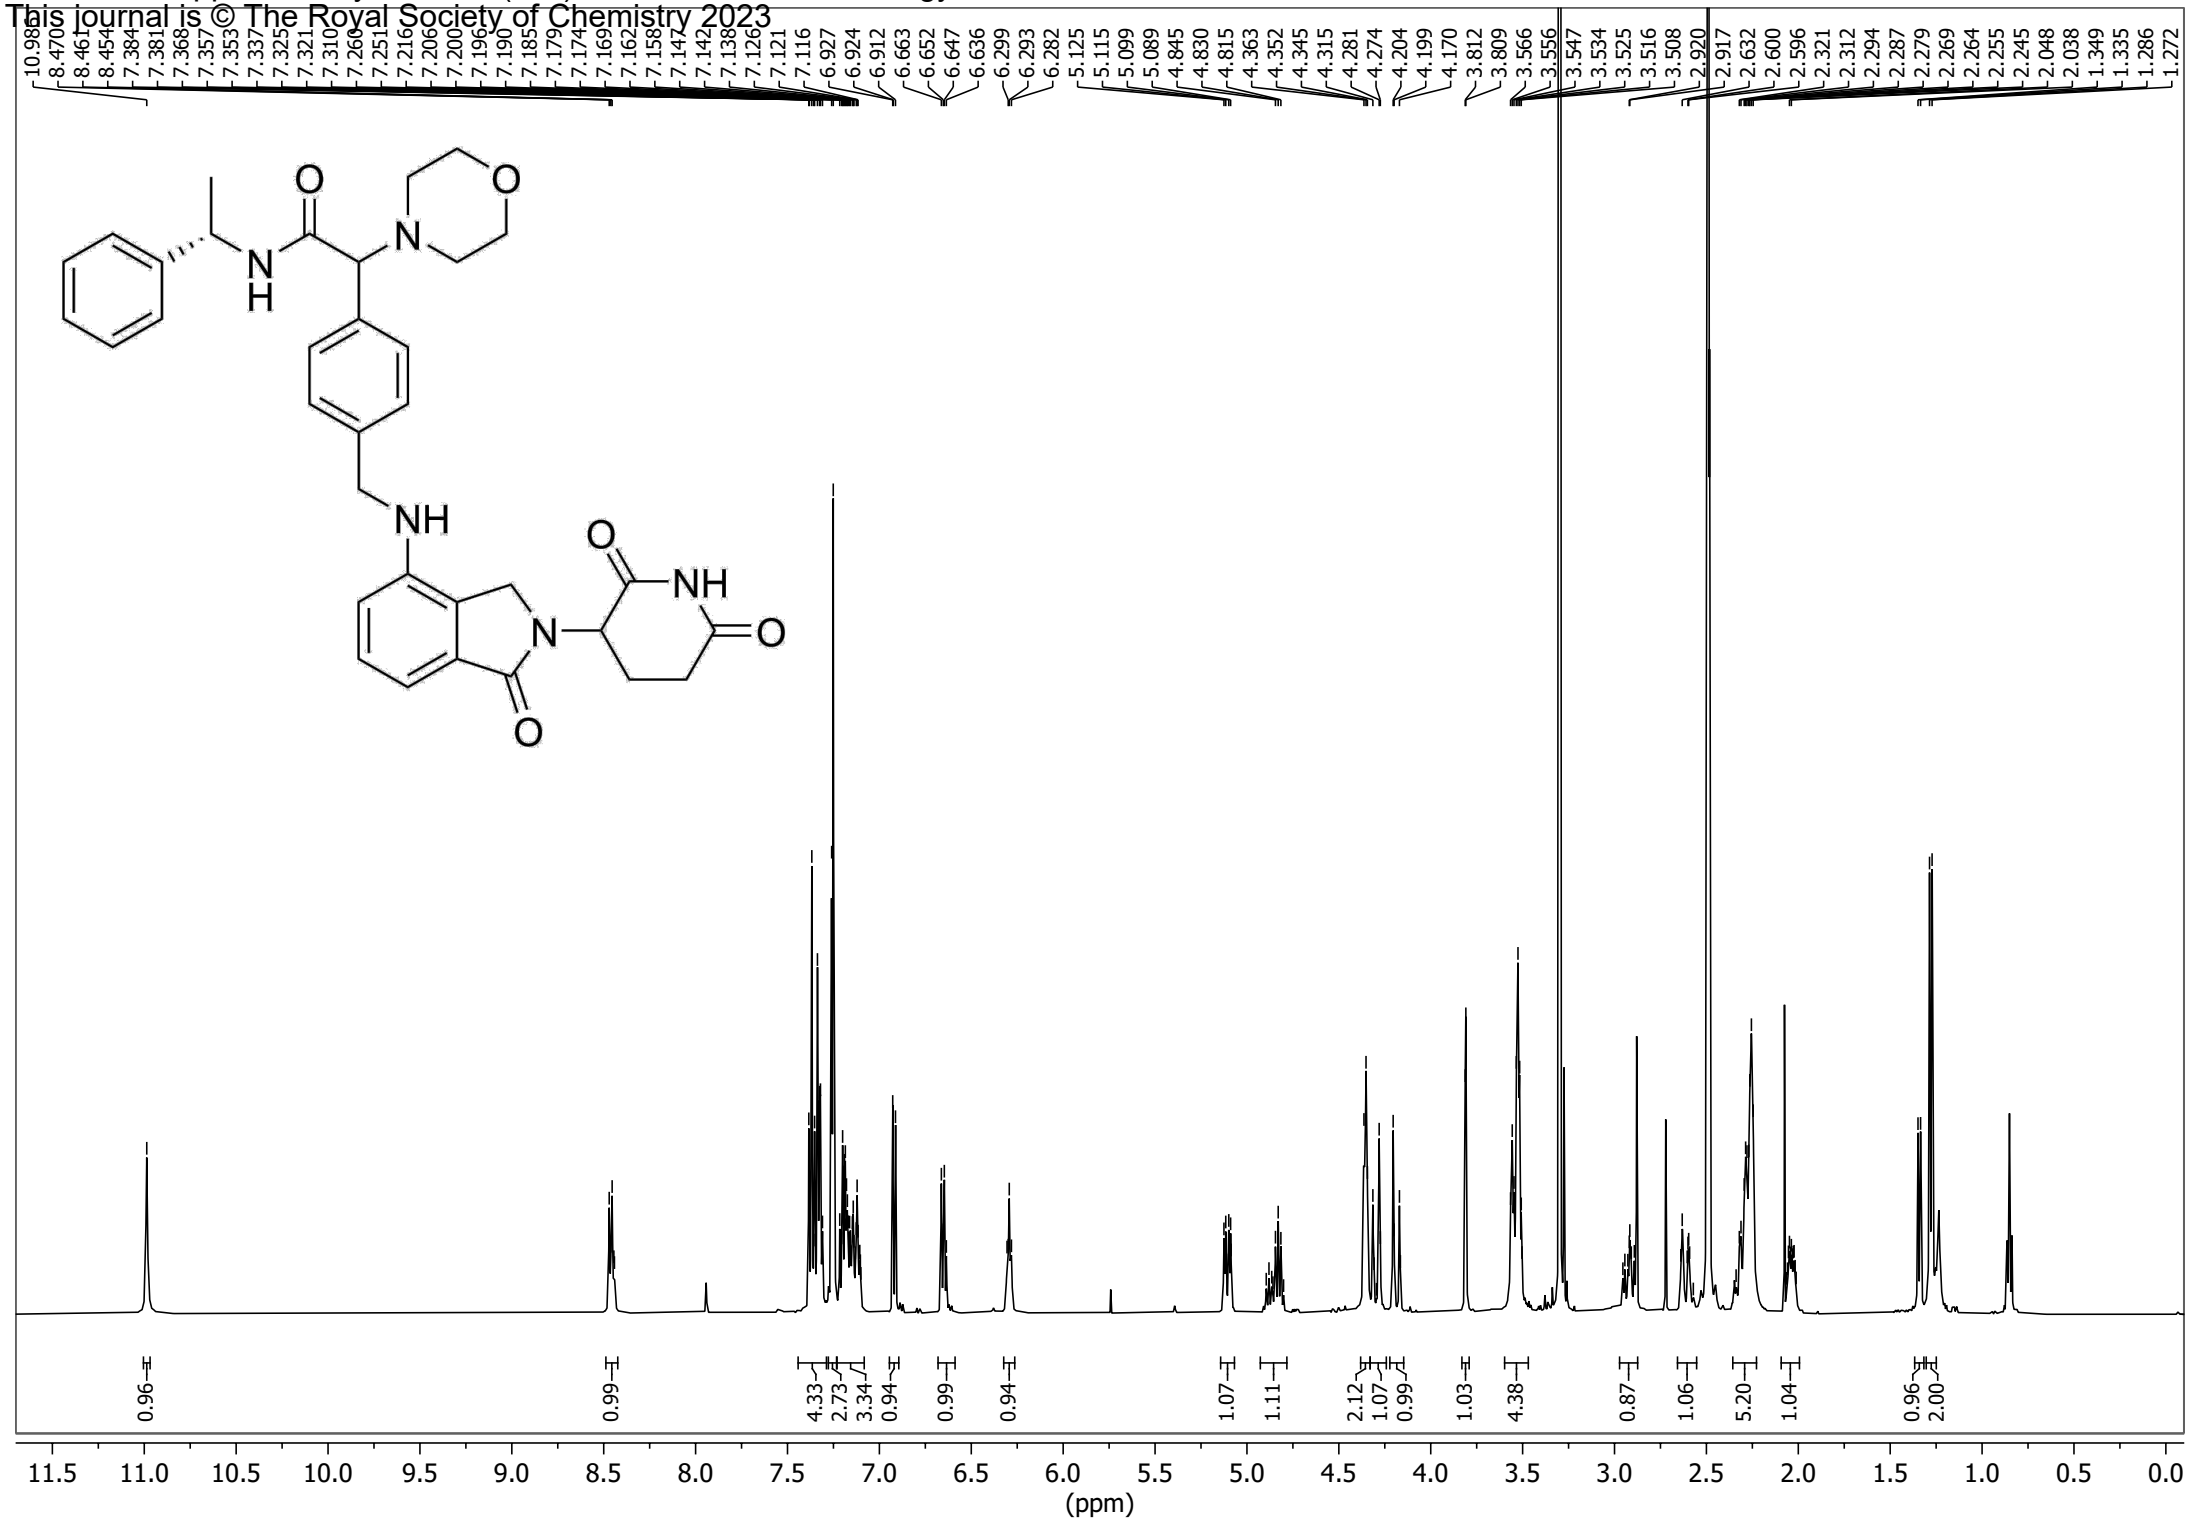

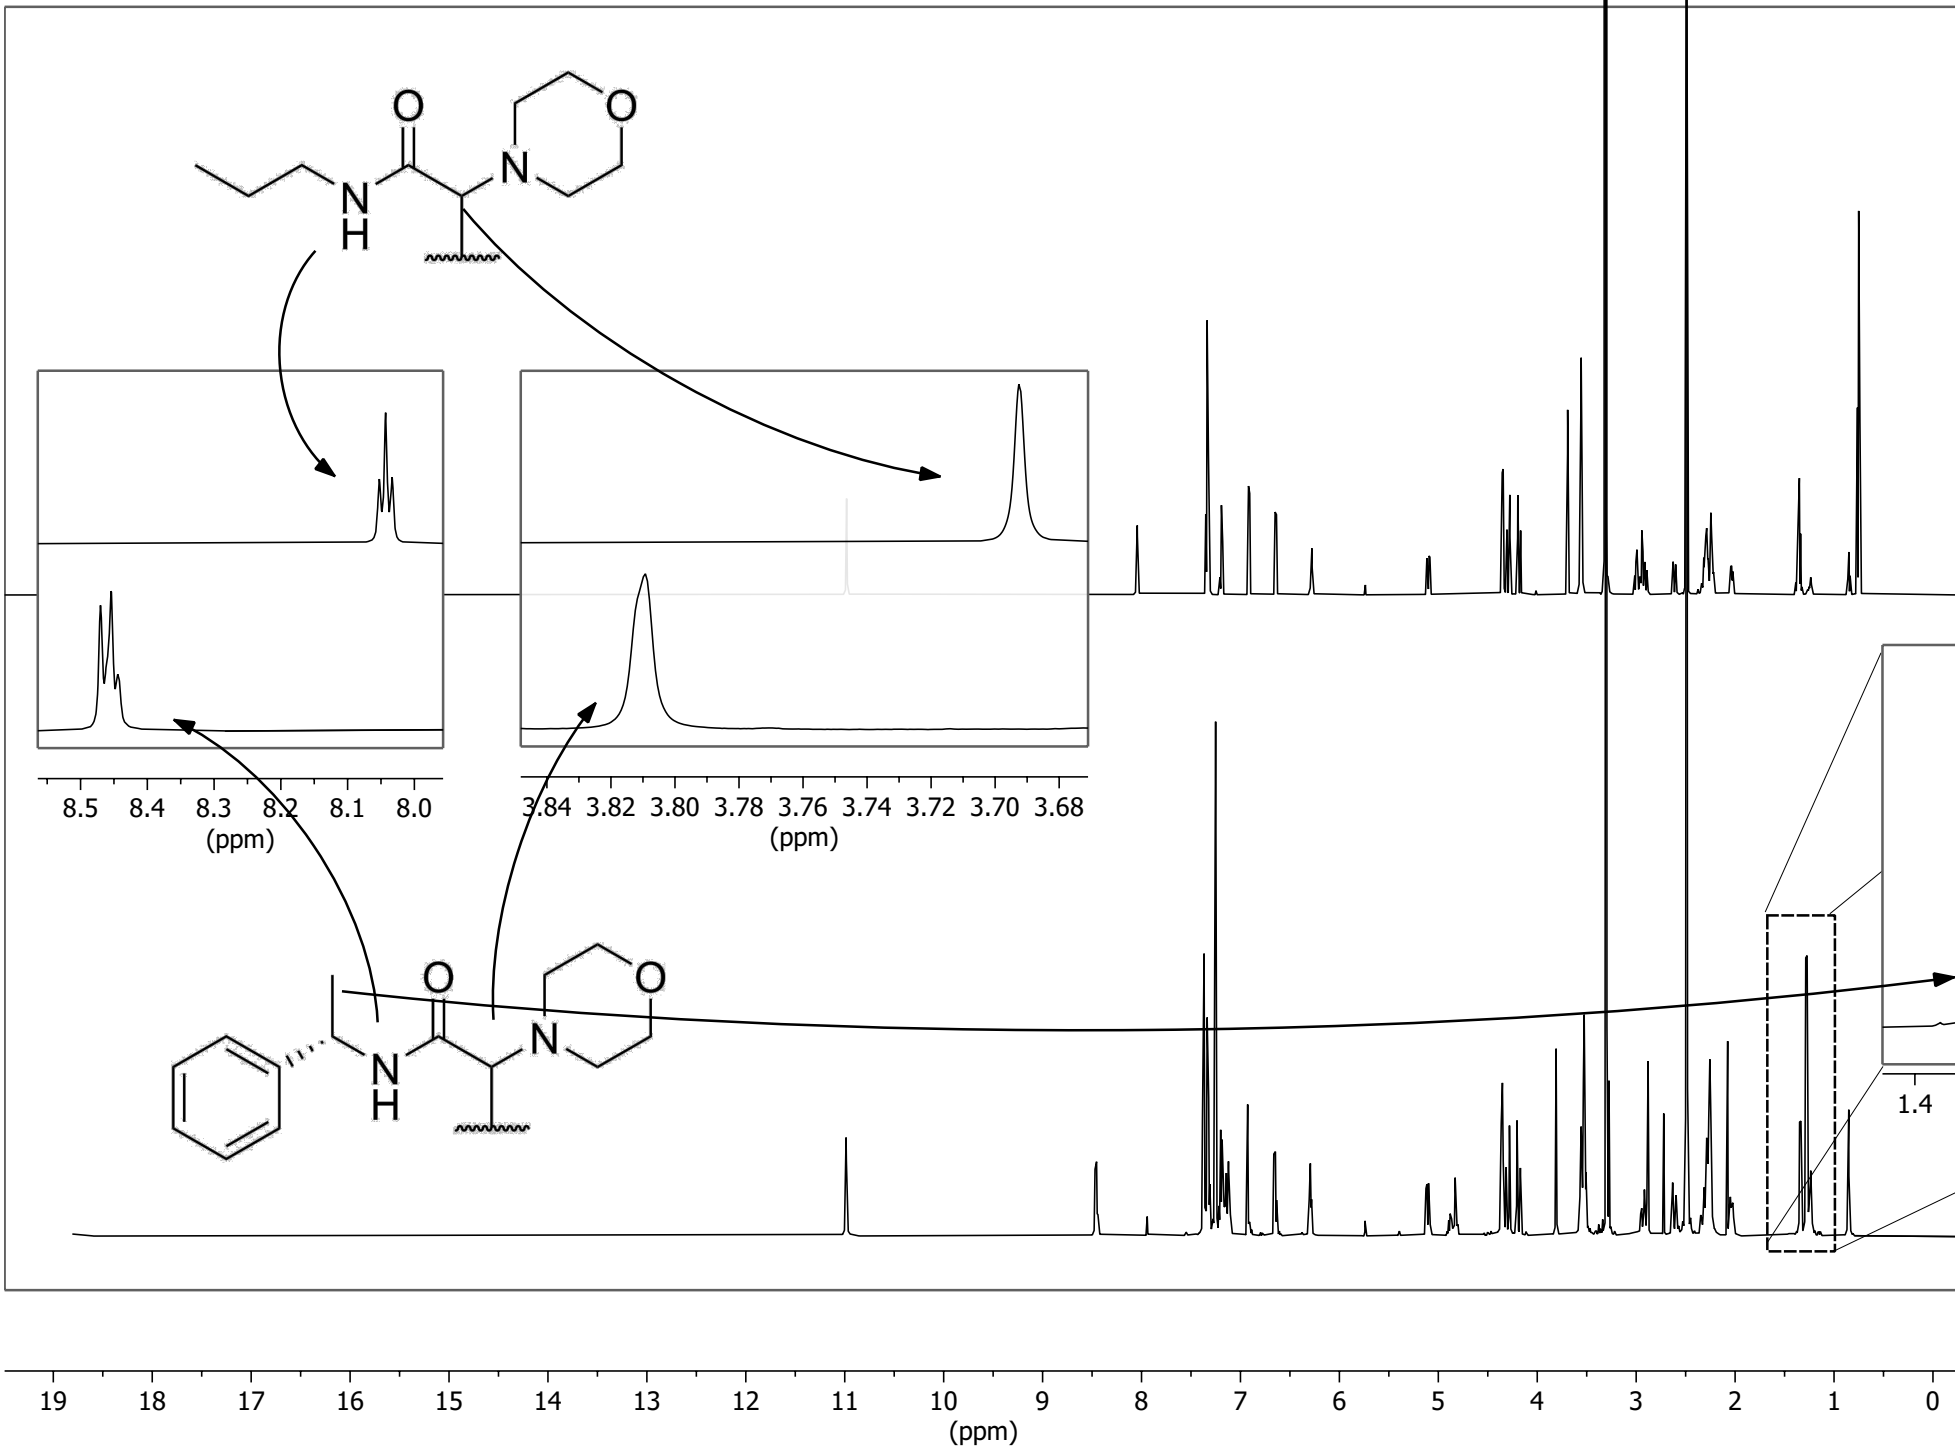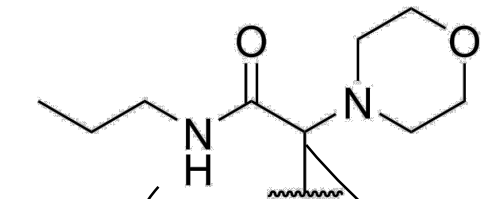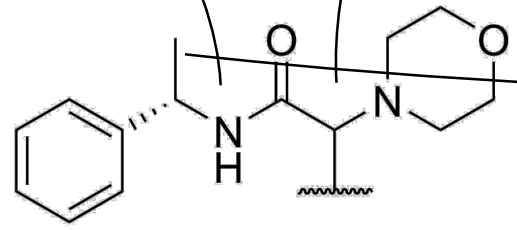

Supplement: d2cb00223j2.pdf [file d2cb00223j2.pdf]
